# Supplementary material
Source: PubMed Central journal article supplement (PMC5993096)
Supplement: cwx099171107supplementaryfile.pdf [file cwx099171107supplementaryfile.pdf]

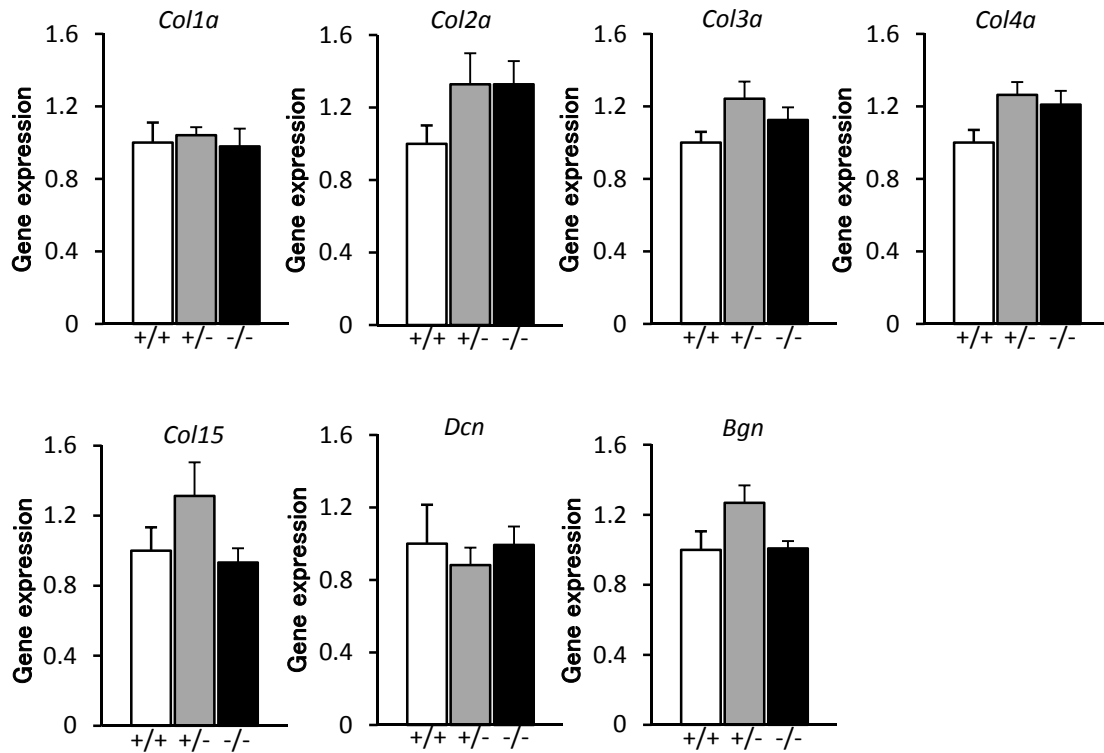

**Supplemental Figure S1. No changes in expression of ECM-related genes.**

Relative mRNA levels of five collagen genes [*collagen I $\alpha$*  (*Col1a*), *collagen II $\alpha$*  (*Col2a*), *collagen III $\alpha$*  (*Col3a*), *collagen IV $\alpha$*  (*Col4a*), *collagen XV* (*Col15*)], *decorin* (*Dcn*), and *biglycan* (*Bgn*)] are shown (means + SEM, n=6/group).

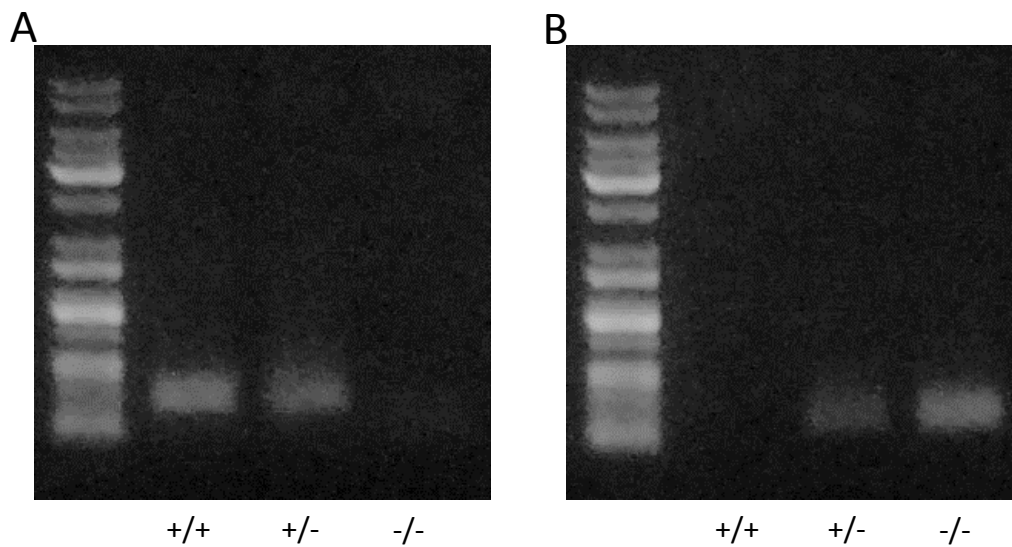

**Supplemental Figure S2. Electrophoretic patterns of genotyping PCR.**

Electrophoretic patterns of genotyping PCR for the *Chst14* gene (A) and neomycin resistance gene (B). (A) The product size of the PCR for the *Chst14* gene (exon 1) was 300 bp. Wild-type (+/+) and heterozygous (+/-) were positive. Homozygous (-/-) was negative. (B) The product size of the PCR for the neomycin resistance gene was 235 bp. Wild-type was negative. Heterozygous and homozygous were positive. Left lanes in the electrophoretic patterns contain a size marker (100–10,000 bp DNA ladder).

**Supplementary Table I. qRT-PCR primer sequences**

| gene                                    | F/R | Sequence (5'–3')        |
|-----------------------------------------|-----|-------------------------|
| <i>18s Ribosomal RNA</i>                | F   | ATCATGCAGAACCCACGACA    |
|                                         | R   | ACACGAAGGCCCCAAAAGT     |
| <i>Carbohydrate sulfotransferase 14</i> | F   | CCAAAGTGGCCTGCTCTAACTG  |
|                                         | R   | AAGTCACTGCGGTGGTCCAT    |
| <i>Carbohydrate sulfotransferase 11</i> | F   | CCCTTCGGTGTGGACATCTG    |
|                                         | R   | GCAGGATGGCAGTGTTGGAT    |
| <i>Collagen I<math>\alpha</math></i>    | F   | ATGGATTCCCGTTCGAGTACG   |
|                                         | R   | TCAGCTGGATAGCGACATCG    |
| <i>Collagen II<math>\alpha</math></i>   | F   | TGGAAGAGATGGTGCAGCTG    |
|                                         | R   | CAGCCTCTCCTCTGTCTCCT    |
| <i>Collagen III<math>\alpha</math></i>  | F   | TGACTGTCCCACGTAAGCAC    |
|                                         | R   | AGGAAGATCAGGAGGGCCAT    |
| <i>Collagen IV<math>\alpha</math></i>   | F   | AACAACGTCTGCAACTTCGC    |
|                                         | R   | CTTCACAAACCGCACACCTG    |
| <i>Collagen XV</i>                      | F   | TCATTGGTGTCCCATTACCC    |
|                                         | R   | AAAGCTGTAAGCCGGGAAAC    |
| <i>Biglycan</i>                         | F   | GAGGGAACCTTCACTTGGACAAC |
|                                         | R   | CACCTTGGTGATGTTGTTGG    |
| <i>Decorin</i>                          | F   | ATCACCAAGCTGCGGAAATC    |
|                                         | R   | AAGGCTCCGTTTTCAATCCC    |
